1        **Automatic Measurements of Smooth Pursuit Eye Movements by**  
2        **Video-Oculography and Deep Learning-Based Object Detection**

3

4        **Authors:** Masakazu Hirota<sup>1,2</sup>, Takao Hayashi<sup>1,2</sup>, Emiko Watanabe<sup>2</sup>, Atsushi Mizota<sup>2</sup>

5

6        **Affiliations:**

7        <sup>1</sup>Department of Orthoptics, Faculty of Medical Technology, Teikyo University, Itabashi,  
8        Tokyo, Japan.

9        <sup>2</sup>Department of Ophthalmology, School of Medicine, Teikyo University, Itabashi, Tokyo,  
10        Japan.

11

12        **Corresponding author:** Masakazu Hirota

13        Address: 2-11-1 Kaga, Itabashi, Tokyo, 173-8605 Japan

14        Tel: +81-03-3964-1328

15        Fax: +81-03-3963-0303

16        E-mail: [hirota.ortho@med.teikyo-u.ac.jp](mailto:hirota.ortho@med.teikyo-u.ac.jp)

17

18        **Running title**

19        Video-Oculography and Deep Learning-Based Object Detection

## 20 **Abstract**

### 21 **Purpose**

22 The purpose of this study was to develop a technique that would combine video  
23 oculography (VOG) with single shot multibox detector (SSD) to accurately and  
24 quantitatively examine eye movements.

25

### 26 **Methods**

27 Eleven healthy volunteers ( $21.3 \pm 0.9$  years) participated in this study. Eye  
28 movements were recorded during the tracking of the target using a custom-made eye  
29 tracker based on EMR-9 (NAC Image Technology Inc.). The subjects were asked to  
30 fixate on the nose of the rabbit-like target (visual angle was  $0.1^\circ$ ) that was manually  
31 moved to a distance of 1 meter by the examiner during the nine directions eye  
32 movement test. The test produced 500 images from the VOG external camera and  
33 these images were divided into 3 groups (300, 100, and 100) for training, verification,  
34 and testing. The performance of the SSD was evaluated with 75% average precision  
35 ( $AP_{75}$ ), and the relationship between the location of the fixation target (calculated by  
36 the SSD) and the positions of both eyes (recorded by the VOG) was analyzed.

37

### 38 **Results**

39 The AP<sub>75</sub> of the SSD on one class of targets was 97.7%. The horizontal and vertical  
40 target locations significantly and positively correlated with the horizontal dominant  
41 (horizontal, *adjusted R*<sup>2</sup> = 0.984, *P* < 0.001; vertical, *adjusted R*<sup>2</sup> = 0.955, *P* < 0.001)  
42 and nondominant (horizontal, *adjusted R*<sup>2</sup> = 0.983, *P* < 0.001; vertical, *adjusted R*<sup>2</sup> =  
43 0.964, *P* < 0.001) eye positions.

44

## 45 **Conclusions**

46 Our findings suggest that using VOG with SSD is suitable to evaluate eye version  
47 movements in the standard clinical assessment.

48

49

50

51

52

53

54

55

56

57

## 58 **Introduction**

59 Strabismus is one of the eye movement disorders, and confirming of version eye  
60 movement, in which smooth pursuit eye movement (SPEM),<sup>1-8</sup> in nine directions is  
61 important to detect limitation of eye movement.<sup>9-11</sup> In most ophthalmology clinics, the  
62 examiner visually evaluates SPEM.<sup>12, 13</sup> The examiner detects abnormalities in eye  
63 movements by carefully examining SPEM.<sup>12, 13</sup> However, the current method does not  
64 allow recording them during the examination and does not quantitatively evaluate the  
65 SPEM.

66  
67 In the laboratory, several methods have been used to quantify eye movements, for  
68 example, the search coil method,<sup>14, 15</sup> electrooculography,<sup>16</sup> and video-oculography  
69 (VOG).<sup>15</sup> These techniques can record eye movements of both eyes simultaneously  
70 while the subjects are fixating a moving target. Especially, VOG is used to evaluate  
71 eye movements in strabismus patients with wide range of age groups from children to  
72 adults<sup>17-20</sup> because it can measure eye movements non-invasively and easily.

73 However, laboratory methods have not been introduced into clinic practice for the  
74 following a basic reasons: The VOG is operated with the display, which limits the  
75 flexibility of the examination. The target only makes a fixed movement, and the  
76 movement cannot be changed flexibly depending on the eye movement disorder.

77

78 We hypothesized that a combination of VOG and a deep learning-based object  
79 detection algorithm is one method of translating laboratory methods to the clinic.  
80 Deep learning-based object detection technology can predict the location and types  
81 of objects in one image.<sup>21-23</sup> Furthermore, the deep learning-based object detection  
82 algorithm can detect the objects faster than conventional simpler algorithm that used  
83 raster scans per image.<sup>24</sup> Therefore, we expected that by using VOG to record SPEM  
84 and deep learning-based object detection to record movements of the target, the  
85 combination system can then measure the SPEM and target, simultaneously without  
86 changing the clinical examination.

87

88 Thus, this study aimed to develop a technique that would combine VOG with deep  
89 learning-based object detection that can quantify SPEM. We evaluated the target  
90 location and both eye positions in healthy volunteers without changing the clinical  
91 method. The experiments were designed to be performed as close to the  
92 ophthalmological clinic as possible.

93

## 94 **Methods**

### 95 **Subjects**

96 Eleven volunteers (age, 20–24 years) participated in this study. All subjects  
97 underwent complete ophthalmologic examinations, including determination of ocular  
98 dominance using the hole-in-card test, best-corrected visual acuity at distance  
99 (5.0 m), near point of convergence, stereoscopic acuity (Titmus stereotest; Stereo  
100 Optical Co., Inc., Chicago, USA) at 40 cm, and heterophoria by alternate cover test  
101 both at near (33 cm) and at distance (5.0 m), and fundus examinations. Stereoacuity  
102 was converted to the logarithm of the arcsecond (log arcsec). Participants were  
103 excluded if they had a refractive error  $>\pm 10.0$  D [mean  $\pm$  standard deviation].

104

105 Informed consent was obtained from all subjects after the nature and possible  
106 complications of the study were explained to them. This investigation adhered to the  
107 tenets of the World Medical Association Declaration of Helsinki. Furthermore,  
108 informed consent for publication of identifying information/images in an online  
109 open-access publication was obtained from a part of subjects. The Institutional  
110 Review Board of Teikyo University approved the experimental protocol and consent  
111 procedures (approval no. 18–161).

112

### 113 **Eye movement recordings**

114 Eye movements were recorded during the tracking of the target using a custom-made

115 eye tracker based on EMR-9 (NAC Image Technology Inc., Tokyo, Japan) (Fig. 1).  
116 The EMR-9 tracker determined the eye positions by detecting the corneal reflex and  
117 pupil center created by the reflection of a near-infrared light that can be adjusted by  
118 the half-mirror. The sampling rate was 240 Hz, the measurement angle was  $\pm 31^\circ$  from  
119 the center of the scene camera, and the measurement error was  $0.2^\circ$ – $0.5^\circ$   
120 (interquartile range) at a distance of 1.0 m. The EMR-9 controller merged the gaze of  
121 both eyes to the real scenes (resolution,  $640 \times 480$  pixels) that were recorded by a  
122 scene camera with a sampling rate of 29.97 Hz and a delay of  $\leq 52$  ms.

123

124 All subjects underwent a calibration test under binocular conditions with the fully  
125 corrected glasses at 1.0 m before the eye movement test. Noise caused by lens  
126 reflection was noted in 2 of 11 participants and avoided by manually changing the tilt  
127 of the half-mirror. During the calibration, all subjects were asked to fixate a black  
128 nine-point target (visual angle,  $0.1^\circ$ ) on a whiteboard. The center of the screen was  
129 defined as  $0^\circ$ , the right and upper halves of the screen were defined as the positive  
130 sides, and the left and lower halves were defined as the negative sides.

131

### 132 **Pilot Study**

133 The accuracy of VOG was evaluated in an ideal environment as a pilot study. Two

134 subjects participated in the pilot study. The target was a rabbit-like character (Fig. 2).  
135 The size of the target was 10 × 10 cm, which subtended a visual angle of 5.7° at 1.0  
136 m. The target was displayed on a 24-inch liquid crystal monitor. The center of the  
137 monitor was defined as 0°, the right and upper halves of the monitor were defined as  
138 the positive sides, and the left and lower halves were defined as the negative sides.  
139 The target moved to ±10° with a random velocity of ≤10°/s. The subjects were seated  
140 in a well-lit room (600 lx) wearing their fully corrective spectacles. The subject's head  
141 was fixed with a chin rest and forehead rest. The subjects were asked to fixate on the  
142 nose of the target whose visual angle was 0.1° at 1.0 m for 60 s.

143

#### 144 **Eye movement test**

145 The main study used the same target with pilot study (Fig 2). The target was manually  
146 moved within ±15° for 60 s by an examiner. All subjects were seated in a well-lit room  
147 (600 lx) wearing their fully corrective spectacles. The subject's head was fixed with a  
148 chin rest and forehead rest. The subjects were asked to fixate on the nose of the  
149 target whose visual angle was 0.1° at 1.0 m during the nine directions eye movement  
150 test.

151

#### 152 **Training, validation, and test sets**



153 A total of 500 images were extracted from the video recordings of the eye movement  
154 test, which had been recorded by an EMR-9 scene camera for Subject 1. The training,  
155 validation, and test datasets were randomly divided into 300 (60%), 100 (20%), and  
156 100 (20%) images, respectively.

157

### 158 **Object detection algorithm**

159 An SSD was used.<sup>22</sup> The SSD quantifies the output space of the bounding box into a  
160 set of default boxes regardless of the aspect ratio and scale for each feature map  
161 position. The network generates a score for the presence of each object category in  
162 each default box and makes adjustments to the box to better match the shape of the  
163 object in the prediction. The network combines the predictions from multiple feature  
164 maps with different resolutions to handle objects of different sizes.

165

166 The SSD was divided into the following two parts: shared feedforward convolutional  
167 network and set of subnetworks for classification and regression, which do not share  
168 computations. A pre-trained VGG16 convolutional neural network was used as a  
169 base network.<sup>25, 26</sup> The target images were resized to 300 × 300 pixels in the  
170 preprocessing; then, data augmentation was applied to these target images. The data  
171 that were convolved 10 times were extracted as Source 1 (channel number, 512;

172 feature size,  $38 \times 38$ ) by normalizing the size. The data that were convolved 15 times  
173 were defined as Source 2 (channel number, 512; feature size,  $19 \times 19$ ). The VGG  
174 output of Source 2 was entered into the extra module. The extra module convoluted  
175 Source 2 eight times, and the sources from 3 to 6 (feature sizes,  $10 \times 10$ ,  $5 \times 5$ ,  $3 \times 3$ ,  
176 and  $1 \times 1$ , respectively) were output each time it was convoluted twice. Next, the  
177 sources were entered into the location and confidence module, and these data were  
178 convoluted once. The location module outputted the offset of the default bounding  
179 box. The confidence module outputted the confidence of each class for the default  
180 bounding box.

181

182 In the training phase, we set the following parameters: 100 epochs, batch size of 32,  
183 and Adam optimizer with the learning rate of 0.001. The validation was performed  
184 every 10 epochs.

185

186 The SSD model was evaluated by the average precision of the test dataset. The AP  
187 was calculated by the integral of precision and recall. The intersection of union was  
188 calculated by dividing the area of overlap between the predicted bounding box and  
189 the ground-truth bounding box that was included target name and target location  
190 manually defined by an examiner (MH) and the area of union of both bounding boxes.

191 We defined an IoU  $\geq 75\%$  as “correct.” Subsequently, the results of the test dataset  
192 were classified as follows: true positive (TP), predicted bounding box has been  
193 covered with ground-truth bounding box (IoU  $\geq 75\%$ ); false positive (FP), predicted  
194 bounding box has been covered with ground-truth bounding box (IoU  $< 75\%$  and IoU  
195  $\neq 0$ ); false negative (FN), predicted bounding box has not been covered with  
196 ground-truth bounding box (IoU = 0); and true negative, predicted bounding box and  
197 ground-truth bounding box did not exist. Precision was defined as the percentage at  
198 which the IoU can be correctly predicted with an accuracy of  $\geq 75\%$ . This was  
199 calculated by  $TP / (TP + FP)$ . Recall was defined as the percentage at which the ratio  
200 that bounding box at apposition close to the correct answer can be predicted if the  
201 IoU is  $\geq 75\%$  and was calculated by  $TP / (TP + FN)$ . The AP was calculated by the  
202 integral of precision and recall.

203

204 We used the software Python 3.6.5 on Windows 10 (Microsoft Co., Ltd., Redmond,  
205 WA, USA) with the following libraries: Matplotlib 3.2.0, Numpy 1.18.1, OpenCV 4.0.1,  
206 Pandas 1.0.1, Pytorch 1.0.2, Scikit-learn 0.22.2, and Seaborn 0.10.0.

207

## 208 **Calculating target location**

209 The SSD drew the location of the object as the bounding box. The bounding box was

210 computed from two coordinates of  $X_{\min}$ ,  $Y_{\min}$ , and  $X_{\max}$ ,  $Y_{\max}$ . The center of the object  
211 coordinates ( $C_x$ ,  $C_y$ ) was determined by  $((X_{\max} + X_{\min}) / 2, (Y_{\max} + Y_{\min}) / 2)$ . Thus, the  
212 target location was defined as the center of the bounding box, and a program that  
213 outputs the target location in each frame with the recording time synchronized with  
214 the EMR-9 findings to an Excel file (Microsoft Co., Ltd.) in the inference phase was  
215 implemented.

216

## 217 **Data analyses**

218 Data on eye positions and pupil sizes of both eyes were exported to a CSV file. Data  
219 were excluded if the pupil diameter changed by  $>2$  mm/frame due to blinking.<sup>27</sup> Data  
220 were also excluded if the pupil diameter changed by  $>0.2$  mm/frame over an average  
221 of 11 points and median of 5 points due to noise. A linearly interpolated value  
222 replaced the missing values. Horizontal and vertical eye movements were analyzed,  
223 and the SPEM and SEM were identified using a velocity-threshold identification (I-VT)  
224 filter.<sup>28</sup> The I-VT filter was used to classify eye movements based on the velocity of  
225 the directional shifts of the eye. The saccade was defined as the median velocity of  
226 three consecutive windows  $>100^\circ/\text{s}$ . Then, the eye position data at 240 Hz were  
227 synchronized with the target data at 29.97 Hz.

228

229 The waveforms of the target locations and eye positions peaked when the moving  
230 direction was reversed (Fig. 3). The latency of SPEM was calculated from the  
231 difference between the horizontal and vertical target location peaks and the dominant  
232 and nondominant eye position peaks. The latency of both eyes was calculated three  
233 times or more and averaged for each subject.

234

### 235 **Statistical analyses**

236 The relationships between the target location and both eye positions were assessed  
237 using simple linear regression analysis. The difference between the latencies of the  
238 dominant and nondominant eyes was analyzed by paired *t*-tests. The relationship  
239 between latencies of horizontal and vertical SPEM within both eyes was assessed  
240 using single linear regression analysis.

241

242 The IBM SPSS Statistics version 26 software (IBM Corp., Armonk, NY, USA) was  
243 used to determine the significance of the differences, and a *P*-value < 0.05 was  
244 considered statistically significant.

245

## 246 **Results**

### 247 **Pilot Study**

## 248 **Accuracy of VOG in conventional laboratory method**

249 The target location was significantly correlated with both eye positions. The horizontal  
250 and vertical target locations were significantly and positively correlated with the  
251 horizontal dominant (*adjusted R*<sup>2</sup> = 0.989, *P* < 0.001) and nondominant (*adjusted R*<sup>2</sup> =  
252 0.989, *P* < 0.001) eye positions. The vertical dominant (*adjusted R*<sup>2</sup> = 0.987, *P* <  
253 0.001) and nondominant (*adjusted R*<sup>2</sup> = 0.987, *P* < 0.001) eye positions are shown in  
254 Figure 4.

255

## 256 **Main study**

### 257 **Demographics**

258 The mean ± standard deviation of the refractive errors (spherical equivalents) of the  
259 dominant eye was  $-2.95 \pm 2.46$  diopters (D), and that of the nondominant eye was  
260  $-2.70 \pm 2.60$  D. The best-corrected visual acuity was 0.0 logMAR units or better in all  
261 subjects. The average heterophoria was  $-1.3 \pm 0.9$  prism diopters (PD) at distance  
262 and  $-3.1 \pm 4.4$  PDs at near. All healthy individuals had a stereo acuity of 1.60 log  
263 arcsec.

264

## 265 **Integration of deep learning-based object detection and VOG**

266 A representative result for our single shot multibox detector (SSD) is shown in Figure

267 5. The SSD could correctly track a target that an examiner manually moved. The  
268 average precision of the SSD on one class of targets was 97.7% in the test dataset.

269

270 The horizontal and vertical target locations were significantly and positively correlated  
271 with the horizontal dominant (*adjusted R*<sup>2</sup> = 0.984, *P* < 0.001) and nondominant  
272 (*adjusted R*<sup>2</sup> = 0.983, *P* < 0.001) eye positions. The vertical dominant (*adjusted R*<sup>2</sup> =  
273 0.955, *P* < 0.001) and nondominant (*adjusted R*<sup>2</sup> = 0.964, *P* < 0.001) eye positions  
274 are shown in Figure 6.

275

276 The latencies of the horizontal and vertical SPEM were 97.3 ± 26.9 and 115 ± 34.1 ms  
277 for the dominant eye (*P* = 0.140), respectively. The latencies of horizontal and vertical  
278 SPEM for the nondominant eye were 108.2 ± 28.6 and 119.1 ± 33.9 ms (*P* = 0.31),  
279 respectively. The latencies of horizontal SPEM were significantly and positively  
280 correlated with the latencies of vertical SPEM in the dominant (*adjusted R*<sup>2</sup> = 0.824, *P*  
281 < 0.001) and nondominant (*adjusted R*<sup>2</sup> = 0.661, *P* = 0.002) eyes.

282

## 283 Discussion

284 Our results show that the combination of VOG and SSD can be used to evaluate the  
285 latency and velocity of SPEM, and this method can be translated into clinical settings

286 without changing the testing methods. The SSD recognized the target with high  
287 accuracy, and the target location was significantly and positively correlated with the  
288 positions of both eyes in main study (Figs. 5 and 6). The small variation in values in  
289 the pilot study (Fig. 1) may have been due to the fact that the examiner moved the  
290 target by hand, making the SSD's bounding box more susceptible to deformation  
291 because the center coordinates of the bounding box were calculated and were  
292 converted from pixels to degrees. Nevertheless, the average precision of the SSD on  
293 one class of targets was 97.7% in the test dataset. We have considered that SSD has  
294 sufficient accuracy can be accumulated to evaluate SPEM  
295  
296 Latency or reaction time of SPEM is one of the parameters to evaluate strabismus.<sup>18,</sup>  
297 <sup>29, 30</sup> In our cohort, the mean latencies of horizontal SPEM were in good agreement  
298 with those reported by Erkelens and Engel.<sup>31, 32</sup> The latencies of horizontal and  
299 vertical SPEM were not significantly different. Although the testing methods were  
300 different, our findings support those of Rottach et al., who reported that the latencies  
301 of the horizontal and vertical SPEM were not significantly different.<sup>33</sup> These findings  
302 suggest that the current system can accurately determine SPEM in healthy  
303 individuals. Therefore, we will investigate subjects with abnormal SPEM in future  
304 work.



305

306 One of the limitations of our system is the low sampling rate due to the use of a scene  
307 camera. If the target moves at a high speed, the target captured by the scene camera  
308 is blurred, and the accuracy of SSD decreases. Therefore, our system cannot  
309 accurately evaluate SEM. In future research, we plan to update our system to  
310 improve the sampling rate of the scene camera to accurately analyze SEM.

311

## 312 **Conclusions**

313 SSD recognized the target that was moved manually with high accuracy, and the  
314 target location was significantly and positively correlated with the positions of both  
315 eyes that was measured by VOG. Our findings suggest that the combination of VOG  
316 and SSD is suitable in evaluating SPEM in the clinic.

317

## 318 **Acknowledgments**

319 All authors thank Mika Suda for illustrating the mascot character. This work was  
320 supported by Grands-in-Aid for Early-Career Scientists, Scientific Research (A) and  
321 (B), Challenging Exploratory Research, Japan Society for the Promotion of Science,  
322 19K20728 (MH), 18H04116 (MH), 20K04271 (MH), 19K21783 (MH), and Charitable  
323 Trust Fund for Ophthalmic Research in Commemoration of Santen Pharmaceutical's

324 Founder (MH).

325 Disclosures: M. Hirota (P); T. Hayashi, None; E. Watanabe, None; A. Mizota, None.

326

## 327 **References**

328 1. Rashbass C. The relationship between saccadic and smooth tracking eye  
329 movements. *The Journal of physiology* 1961;159:326-338.

330 2. Robinson DA. The mechanics of human smooth pursuit eye movement. *The*  
331 *Journal of physiology* 1965;180:569-591.

332 3. Westheimer G, McKee SP. Visual acuity in the presence of retinal-image  
333 motion. *J Opt Soc Am* 1975;65:847-850.

334 4. Kowler E, van der Steen J, Tamminga EP, Collewijn H. Voluntary selection of  
335 the target for smooth eye movement in the presence of superimposed, full-field  
336 stationary and moving stimuli. *Vision Res* 1984;24:1789-1798.

337 5. Lisberger SG, Morris EJ, Tychsen L. Visual motion processing and  
338 sensory-motor integration for smooth pursuit eye movements. *Annu Rev Neurosci*  
339 1987;10:97-129.

340 6. Krauzlis RJ. Recasting the smooth pursuit eye movement system. *Journal of*  
341 *neurophysiology* 2004;91:591-603.

342 7. Heinen SJ, Potapchuk E, Watamaniuk SN. A foveal target increases catch-up

343 saccade frequency during smooth pursuit. *Journal of neurophysiology*

344 2016;115:1220-1227.

345 8. Shanidze N, Ghahghaei S, Verghese P. Accuracy of eye position for

346 saccades and smooth pursuit. *Journal of vision* 2016;16:23.

347 9. Helveston EM, Moodley A. How to check eye alignment and movement.

348 *Community Eye Health* 2019;32:55.

349 10. Harley RD. Paralytic strabismus in children. Etiologic incidence and

350 management of the third, fourth, and sixth nerve palsies. *Ophthalmology*

351 1980;87:24-43.

352 11. Helveston EM. Understanding, detecting, and managing strabismus.

353 *Community Eye Health* 2010;23:12-14.

354 12. Vivian AJ, Morris RJ. Diagrammatic Representation of Strabismus. *Eye*

355 1993;7:565-571.

356 13. Pensyl GG, Benjamin WJ. Ocular motility. In: Benjamin WJ (ed), *Borish's*

357 *clinical refraction (2nd ed)*. St Louis: Butterworth Heinemann Elsevier; 2006.

358 14. Levin S, Luebke A, Zee DS, Hain TC, Robinson DA, Holzman PS. Smooth

359 pursuit eye movements in schizophrenics: quantitative measurements with the

360 search-coil technique. *J Psychiatr Res* 1988;22:195-206.

361 15. Imai T, Sekine K, Hattori K, et al. Comparing the accuracy of

362 video-oculography and the scleral search coil system in human eye movement

363 analysis. *Auris Nasus Larynx* 2005;32:3-9.

364 16. Ingster-Moati I, Vaivre-Douret L, Quoc EB, Albuisson E, Dufier JL, Golse B.

365 Vertical and horizontal smooth pursuit eye movements in children: A

366 neuro-developmental study. *Eur J Paediatr Neuro* 2009;13:362-366.

367 17. Bucci MP, Kapoula Z. Binocular coordination of saccades in 7 years old

368 children in single word reading and target fixation. *Vision Res* 2006;46:457-466.

369 18. Lions C, Bui-Quoc E, Wiener-Vacher S, Seassau M, Bucci MP. Smooth

370 pursuit eye movements in children with strabismus and in children with vergence

371 deficits. *PloS one* 2013;8:e83972.

372 19. Lions C, Bui-Quoc E, Seassau M, Bucci MP. Binocular coordination of

373 saccades during reading in strabismic children. *Investigative ophthalmology & visual*

374 *science* 2013;54:620-628.

375 20. Hirota M, Kanda H, Endo T, et al. Relationship between reading performance

376 and saccadic disconjugacy in patients with convergence insufficiency type

377 intermittent exotropia. *Japanese journal of ophthalmology* 2016;60:326-332.

378 21. Redmon J, Divvala S, Girshick R, Farhadi A. You Only Look Once: Unified,

379 Real-Time Object Detection. *arXiv e-prints*; 2015:arXiv:1506.02640.

380 22. Liu W, Anguelov D, Erhan D, et al. SSD: Single Shot MultiBox Detector. *arXiv*

- 381 *e-prints*; 2015:arXiv:1512.02325.
- 382 23. Ren SQ, He KM, Girshick R, Sun J. Faster R-CNN: Towards Real-Time  
383 Object Detection with Region Proposal Networks. *Ieee T Pattern Anal*  
384 2017;39:1137-1149.
- 385 24. Cho H, Rybski PE, Bar-Hillel A, Zhang W. Real-time pedestrian detection with  
386 deformable part models. *2012 IEEE Intelligent Vehicles Symposium*  
387 2012;2012:1035-1042.
- 388 25. He K, Zhang X, Ren S, Sun J. Deep Residual Learning for Image Recognition.  
389 *arXiv* 2015;arXiv:1512.03385.
- 390 26. Szegedy C, Vanhoucke V, Lofe S, Shlens J, Wojna Z. Rethinking the  
391 Inception Architecture for Computer Vision. *arXiv* 2015;arXiv:1512.00567.
- 392 27. Kwon KA, Shipley RJ, Edirisinghe M, et al. High-speed camera  
393 characterization of voluntary eye blinking kinematics. *J R Soc Interface* 2013;10.
- 394 28. Salvucci D, Goldberg J. Identifying fixations and saccades in eye-tracking  
395 protocols. *ETRA '00: Proceedings of the 2000 symposium on Eye tracking research &*  
396 *applications* 2000;71-78.
- 397 29. Kiorpes L, Walton PJ, O'Keefe LP, Movshon JA, Lisberger SG. Effects of  
398 early-onset artificial strabismus on pursuit eye movements and on neuronal  
399 responses in area MT of macaque monkeys. *The Journal of neuroscience : the official*

400 *journal of the Society for Neuroscience* 1996;16:6537-6553.

401 30. Fukushima J, Tanaka S, Williams JD, Fukushima K. Voluntary control of  
402 saccadic and smooth-pursuit eye movements in children with learning disorders.

403 *Brain Dev-Jpn* 2005;27:579-588.

404 31. Engel KC, Anderson JH, Soechting JF. Oculomotor tracking in two  
405 dimensions. *Journal of neurophysiology* 1999;81:1597-1602.

406 32. Erkelens CJ. Coordination of smooth pursuit and saccades. *Vision Research*  
407 2006;46:163-170.

408 33. Rottach KG, Zivotofsky AZ, Das VE, et al. Comparison of horizontal, vertical  
409 and diagonal smooth pursuit eye movements in normal human subjects. *Vision Res*  
410 1996;36:2189-2195.

411

412

413

414

415

416

417

418

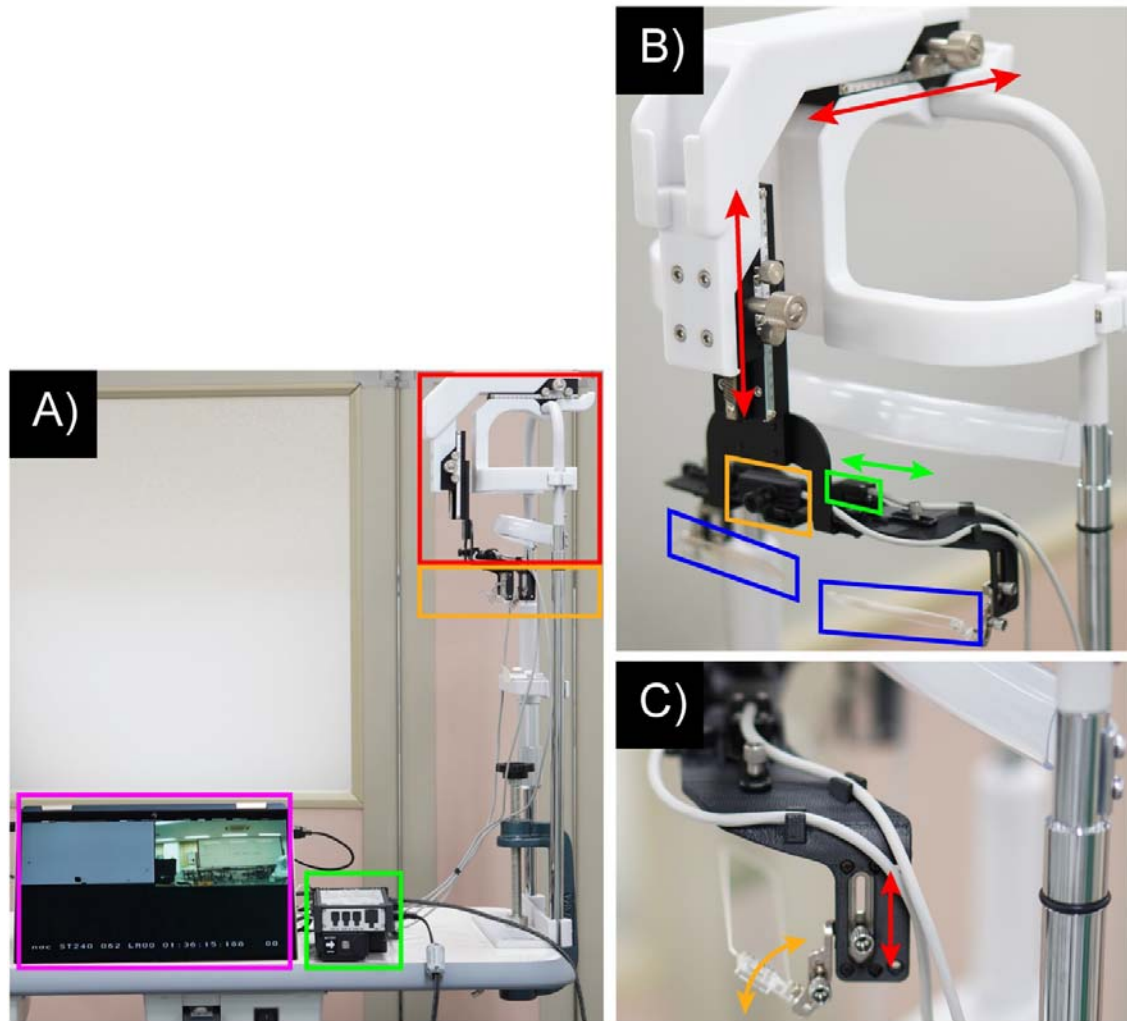

419

420 **Figure 1. Custom-made eye tracker based on EMR-9**

421 The exterior of the custom-made eye tracker was based on EMR-9 (A). The total area

422 of the red and orange squares indicates EMR-9, and the red and orange squares

423 indicate (B) and (C). The green square indicates the controller of the EMR-9. The

424 purple square indicates the output image by EMR-9.

425 In (B), the orange, green, and blue squares indicate the scene camera, eye camera

426 (there is also one for the right eye on the other side), and half-mirrors, respectively.

427 The scene camera is able to rotate 60° in pitch. Both eye cameras can horizontally

428 shift to 1.3 cm (total, 2.6 cm) to adjust the pupillary distance (green two-direction  
429 arrow line). The base position of the EMR-9 can adjust 8.0 cm horizontally and  
430 vertically (red two-direction arrow lines).

431 In (C), the half-mirror can shift to 2.5 cm vertically (red two-direction arrow line) and  
432 rotate 30° in pitch (orange two-direction arrow line).

433

434

435

436

437

438

439

440

441



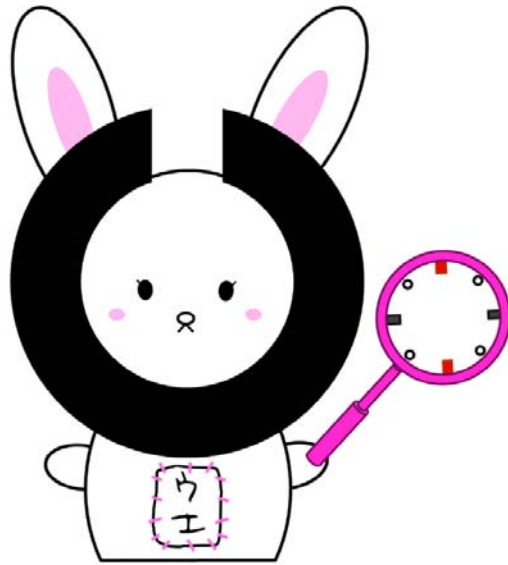

442

443 **Figure 2. Examination target**

444 The rabbit-like character is a mascot of the Department of Orthoptics, Teikyo

445 University (created by Mika Suda). The subjects were asked to fixate on the nose of

446 the target whose visual angle was  $0.1^\circ$  at 1.0 m during the eye movement tests.

447

448

449

450

451

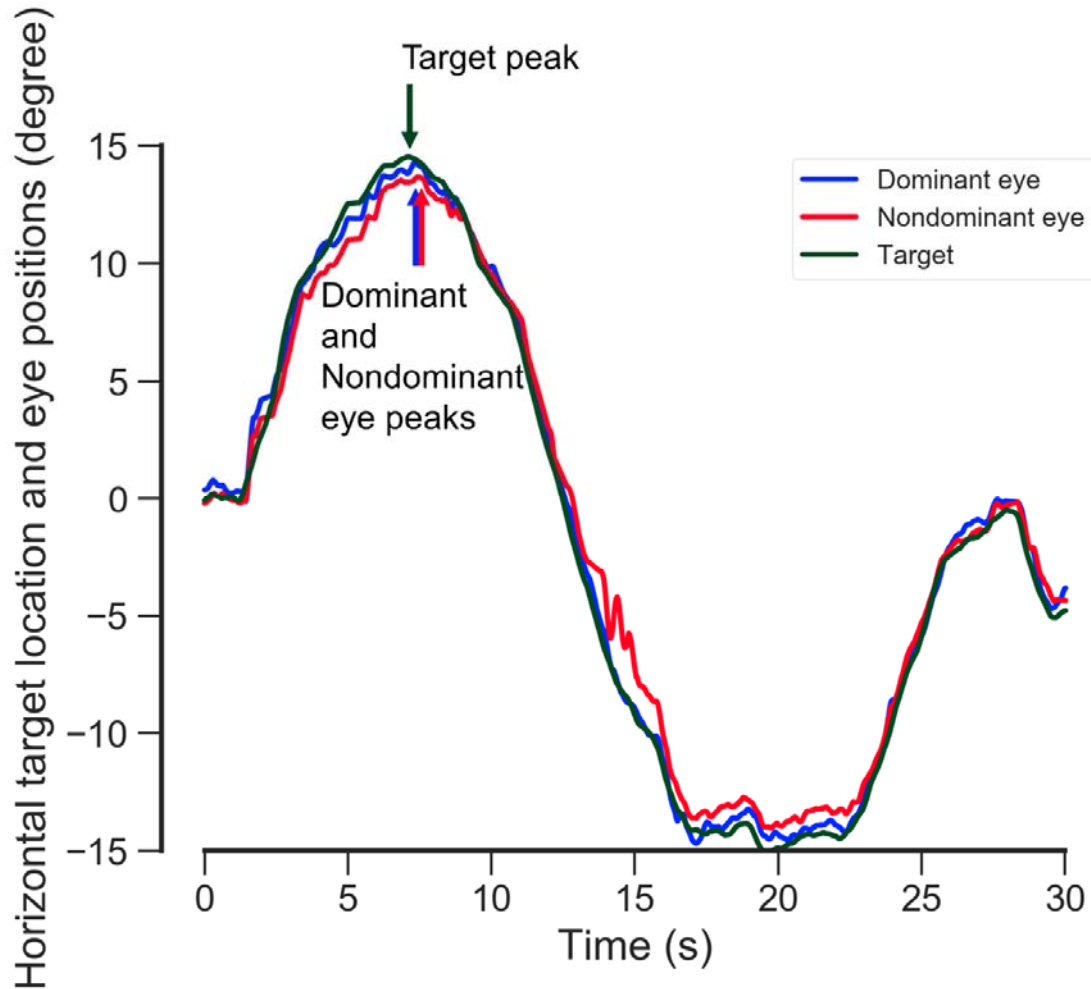

452

453 **Figure 3. Graph showing the latencies of SPEM for the dominant and**

454 **nondominant eyes**

455 The blue, red, and green lines indicate the horizontal dominant and nondominant eye

456 positions and target location during the eye movement test. The latencies of SPEM

457 were calculated from the difference between the target location peak and the

458 dominant and nondominant eye position peaks.

459

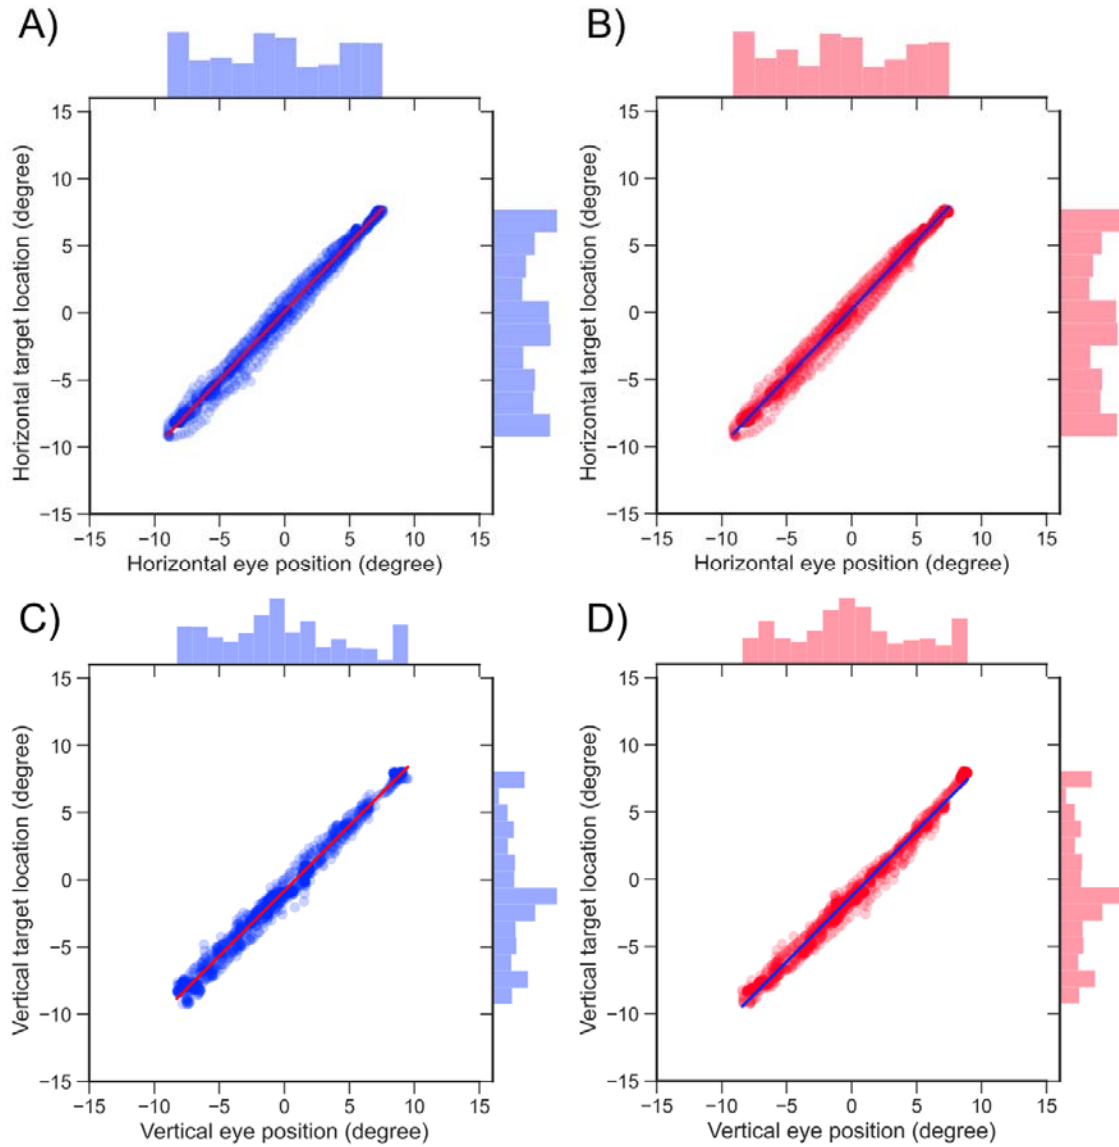

460

461 **Figure 4. Correlations between horizontal (A, B) and vertical (C, D) target**

462 **locations and eye positions in a pilot study (n = 2)**

463 The blue and red dots indicate the relationships between the target and dominant or

464 nondominant eye velocity. The red and blue lines indicate the regression lines. The

465 histograms at the upper and right sides indicate the distribution between the target

466 location and the dominant or nondominant eye position.

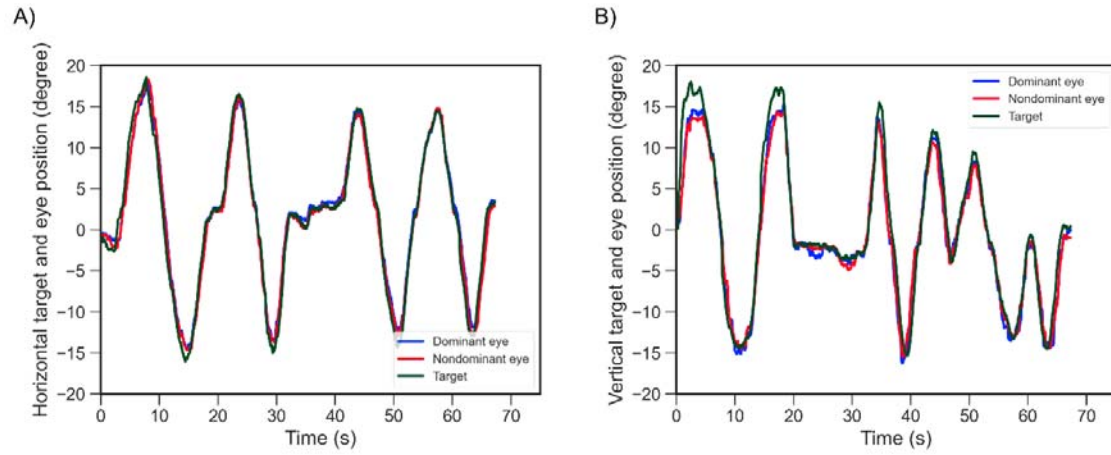

467

468 **Figure 5. Horizontal (A) and vertical (B) target locations and eye positions when**

469 **the examiner moved the target by hand.**

470 The blue, red, and green lines indicate the horizontal dominant and nondominant eye

471 positions and target location during the eye movement test.

472

473

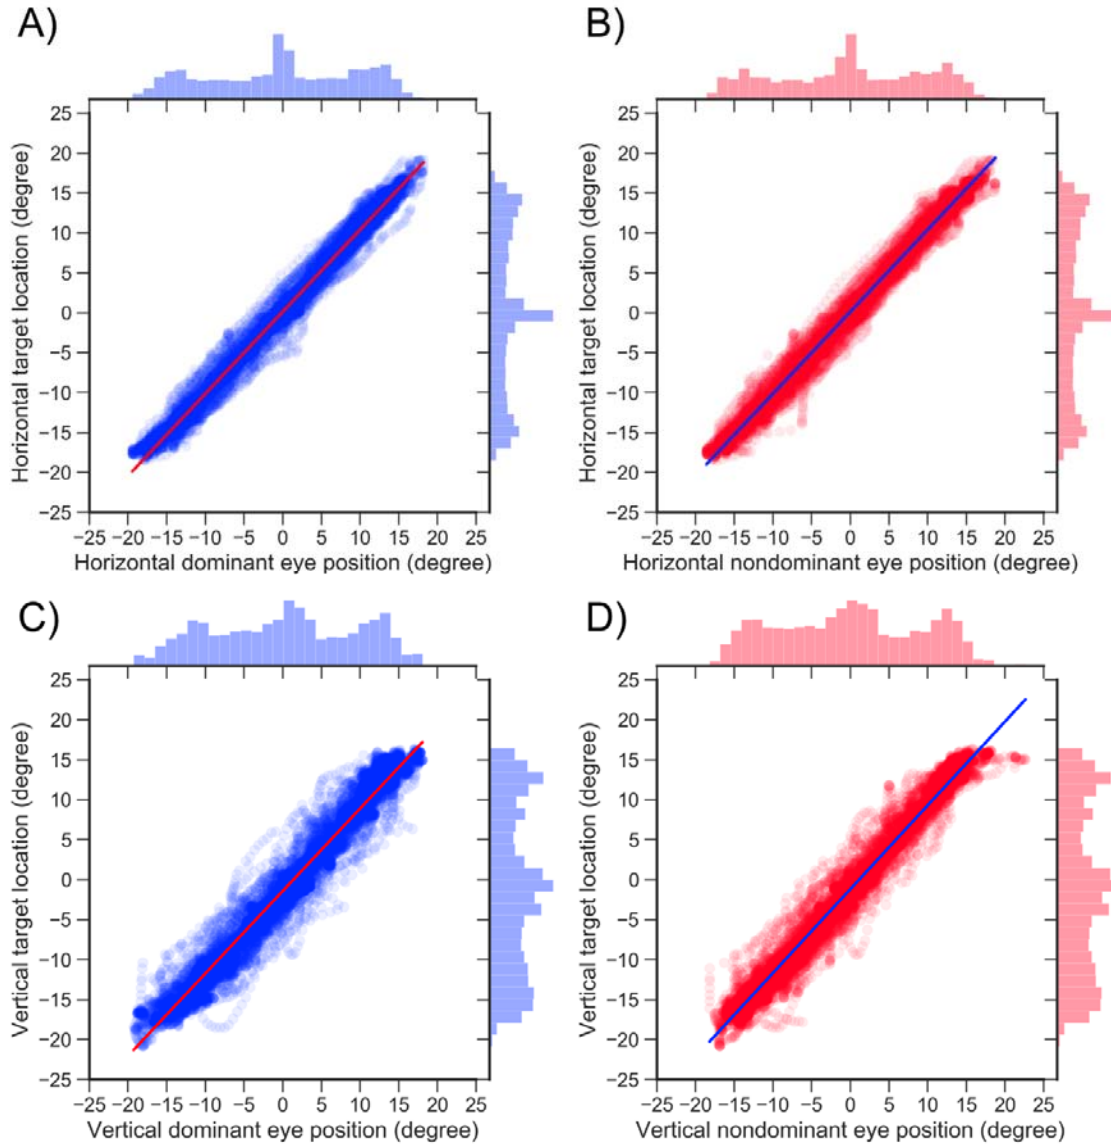

474

475 **Figure 6. Correlations between horizontal (A, B) and vertical (C, D) target**

476 **locations and eye positions**

477 The blue and red dots indicate the relationships between the target and the dominant

478 or nondominant eye velocity. The red and blue lines indicate the regression lines. The

479 histograms at the upper and right sides indicate the distribution between the target

480 location and the dominant or nondominant eye position.
